# Supplementary material
Source: PubMed Central journal article supplement (PMC7963933)
Supplement: 1972_table.pdf [file 1972_table.pdf]

**On-line Table: Clinical, MR imaging, and EEG findings of the 31 patients with TS**

| Patient No. | Age        | Sex | Seizure | Seizure |       |         | Hippocampal Abnormality | Tubers |    |    |    |    |    |    |    | EEG                |
|-------------|------------|-----|---------|---------|-------|---------|-------------------------|--------|----|----|----|----|----|----|----|--------------------|
|             |            |     |         | Type    | Onset | Febrile |                         | RF     | LF | RP | LP | RT | LT | RO | LO |                    |
| 1           | 9 y 5 mo   | M   | Y       | CP      | >1    | N       | N                       | 7      | 3  | 7  | 5  | 3  | 4  | 2  | 3  | Focal              |
| 2           | 8 mo       | F   | Y       | SP      | <1    | N       | Left HIMAL              | 15     | 16 | 10 | 9  | 6  | 5  | 3  | 3  | Multifocal         |
| 3           | 34 y 11 mo | F   | Y       | GTC     | <1    | N       | N                       | 6      | 10 | 2  | 1  | 2  | 3  | 2  | 0  | Multifocal         |
| 4           | 18 y       | F   | N       |         |       |         | N                       | 2      | 2  | 1  | 4  | 1  | 0  | 0  | 0  | Normal             |
| 5           | 9 y        | F   | Y       | CP      | <1    | N       | N                       | 10     | 5  | 4  | 5  | 2  | 7  | 3  | 3  | Normal             |
| 6           | 16 y 4 mo  | M   | N       |         |       |         | N                       | 4      | 4  | 8  | 3  | 6  | 3  | 1  | 1  | Normal             |
| 7           | 3 y 8 mo   | F   | Y       | Clonic  | >1    | N       | N                       | 14     | 7  | 5  | 2  | 4  | 4  | 1  | 2  | Hypsarrhythmia     |
| 8           | 5 y 4 mo   | F   | Y       | GTC     | >1    | N       | N                       | 6      | 9  | 3  | 3  | 1  | 3  | 1  | 1  | Normal             |
| 9           | 2 y 8 mo   | F   | Y       | GTC     | <1    | N       | N                       | 10     | 11 | 6  | 3  | 5  | 6  | 4  | 6  | Focal              |
| 10          | 4 y 3 mo   | M   | Y       | SP      | <1    | N       | N                       | 8      | 8  | 3  | 3  | 1  | 1  | 1  | 1  | Hypsarrhythmia     |
| 11          | 4 y 8 mo   | F   | Y       | GTC     | <1    | N       | N                       | 3      | 0  | 0  | 1  | 2  | 1  | 1  | 0  | Focal              |
| 12          | 10 y       | M   | Y       | Clonic  | >1    | N       | N                       | 4      | 4  | 3  | 2  | 1  | 4  | 1  | 0  | Hypsarrhythmia     |
| 13          | 8 y 4 mo   | M   | Y       | GTC     | <1    | N       | N                       | 3      | 2  | 2  | 0  | 0  | 0  | 0  | 1  | Hypsarrhythmia     |
| 14          | 26 y 4 mo  | M   | Y       | GTC     | <1    | N       | N                       | 5      | 8  | 2  | 5  | 3  | 2  | 1  | 2  | Multifocal         |
| 15          | 10 y 10 mo | M   | Y       | SP      | >1    | N       | N                       | 7      | 4  | 5  | 3  | 1  | 2  | 1  | 1  | Hypsarrhythmia     |
| 16          | 8 y 3 mo   | F   | N       |         |       |         | N                       | 3      | 3  | 3  | 2  | 1  | 2  | 1  | 1  | Focal              |
| 17          | 2 y 3 mo   | F   | Y       | GTC     | >1    | N       | Left MTS                | 9      | 4  | 4  | 3  | 2  | 3  | 0  | 0  | Multifocal         |
| 18          | 20 y       | F   | Y       | CP      | <1    | Y       | Right MTS               | 15     | 11 | 8  | 3  | 5  | 3  | 3  | 2  | Focal              |
| 19          | 8 y 7 mo   | M   | Y       | GTC     | <1    | N       | N                       | 2      | 4  | 2  | 4  | 1  | 3  | 2  | 2  | Focal              |
| 20          | 20 y 11 mo | M   | Y       | SP      | >1    | N       | N                       | 4      | 4  | 2  | 4  | 3  | 3  | 1  | 3  | Focal              |
| 21          | 13 y       | F   | Y       | Tonic   | >1    | N       | N                       | 4      | 4  | 4  | 3  | 0  | 2  | 1  | 2  | Diffuse slow waves |
| 22          | 11 y 3 mo  | M   | Y       | SP      | >1    | N       | Right MTS               | 3      | 3  | 2  | 3  | 3  | 1  | 3  | 0  | Focal              |
| 23          | 30 y 5 mo  | F   | Y       | GTC     | >1    | N       | N                       | 1      | 4  | 2  | 1  | 2  | 0  | 1  | 1  | Normal             |
| 24          | 2 y 4 mo   | M   | Y       | A       | >1    | Y       | N                       | 5      | 9  | 3  | 6  | 4  | 3  | 2  | 3  | Focal              |
| 25          | 8 y 1 mo   | M   | N       |         |       |         | N                       | 5      | 2  | 3  | 3  | 1  | 1  | 1  | 1  | No EEG             |
| 26          | 4 y 8 mo   | F   | Y       | A       | >1    | N       | N                       | 4      | 4  | 1  | 0  | 0  | 0  | 0  | 0  | Focal              |
| 27          | 9 y        | F   | Y       | GTC     | >1    | N       | N                       | 5      | 4  | 3  | 4  | 2  | 2  | 4  | 1  | Multifocal         |
| 28          | 6 y 9 mo   | F   | Y       | A       | >1    | Y       | N                       | 3      | 3  | 1  | 1  | 0  | 1  | 0  | 0  | Multifocal         |
| 29          | 2 y 5 mo   | M   | N       |         |       |         | N                       | 4      | 3  | 1  | 0  | 2  | 1  | 1  | 0  | No EEG             |
| 30          | 12 y       | M   | Y       | GTC     | >1    | N       | N                       | 2      | 4  | 1  | 1  | 0  | 0  | 0  | 0  | Focal              |
| 31          | 9 y        | F   | Y       | A       | <1    | Y       | Left MTS                | 7      | 10 | 6  | 5  | 2  | 2  | 2  | 1  | Normal             |
